# Supplementary material
Source: publisher figshare collection journal article supplement (https://sage.figshare.com/ndownloader/files/18514160)
Supplement: Supplementary file 1 [file 18514160]

| ***Supplemental Table 1.*** Score change by study arm and stratification variables (mean, SD). Counts represent numbers completing 6 month assessments. | | | | | | | | |
| --- | --- | --- | --- | --- | --- | --- | --- | --- |
|  | Gender | | Age | | Race | | ADI State Decile Scoresa | |
|  | Male  PRISM: n=24  Usual Care: n=17 | Female  PRISM: n=12  Usual Care: n=21 | 12-17  PRISM: n=27  Usual Care: n=26 | 18-25  PRISM: n=9  Usual Care: n=12 | White  PRISM: n=27  Usual Care: n=21 | non-White  PRISM: n=9  Usual Care: n=17 | 1-7  PRISM: n=28  Usual Care: n=26 | 8-10  PRISM: n=8  Usual Care: n=8 |
| Resilience |  |  |  |  |  |  |  |  |
| PRISM | 0.8 (4.0) | 2.5 (5.9) | 1.3 (5.3) | 1.4 (2.7) | 1.7 (5.2) | 0.4 (2.9) | 2.0 (5.0) | -0.9 (2.8) |
| Usual Care | -0.9 (4.2) | -0.6 (2.6) | -0.0 (3.4) | -2.3 (2.9) | -1.2 (3.6) | -0.1 (3.0) | -1.0 (3.4) | 0.4 (3.5) |
| Hope |  |  |  |  |  |  |  |  |
| PRISM | 3.0 (5.5) | 4.3 (9.5) | 3.5 (7.3) | 3.2 (6.3) | 4.1 (7.1) | 1.4 (6.5) | 4.2 (7.4) | 0.8 (4.6) |
| Usual Care | -0.1 (6.8) | -0.3 (5.1) | 0.3 (6.4) | -1.3 (4.2) | -0.3 (6.4) | -0.1 (5.2) | -0.2 (5.8) | 0.8 (6.6) |
| Benefit finding |  |  |  |  |  |  |  |  |
| PRISM | 5.0 (6.7) | 2.7 (8.3) | 4.9 (7.1) | 2.0 (7.5) | 3.8 (7.6) | 5.4 (6.2) | 4.2 (7.5) | 4.0 (6.3) |
| Usual Care | 1.9 (7.9) | 0.4 (5.9) | 2.0 (6.1) | -0.9 (8.0) | 2.5 (6.5) | -0.7 (6.9) | 1.7 (7.2) | 0.1 (6.9) |
| Generic QoL |  |  |  |  |  |  |  |  |
| PRISM | 3.8 (21.1) | 10.0 (22.1) | 7.9 (21.4) | 0.0 (21.1) | 3.4 (21.7) | 13.4 (19.0) | 8.8 (21.8) | -4.4 (16.7) |
| Usual Care | -1.7 (15.9) | 1.9 (22.7) | 2.4 (16.4) | -4.3 (26.0) | -1.9 (22.6) | 2.9 (15.9) | -2.4 (19.8) | 6.5 (15.1) |
| Cancer-specific QoL |  |  |  |  |  |  |  |  |
| PRISM | 3.6 (11.8) | 15.9 (19.2) | 9.5 (16.8) | 2.4 (10.1) | 8.0 (16.2) | 6.9 (14.2) | 9.4 (17.0) | 1.8 (6.3) |
| Usual Care | -1.4 (12.6) | -2.9 (13.7) | -1.8 (11.0) | -3.3 (17.2) | -4.7 (15.5) | 0.8 (8.7) | -3.7 (14.8) | 1.3 (8.5) |
| Distress |  |  |  |  |  |  |  |  |
| PRISM | -0.2 (3.6) | -3.4 (6.4) | -1.6 (5.3) | -0.1 (3.4) | -1.0 (4.5) | -1.9 (6.1) | -1.8 (5.1) | 0.6 (3.4) |
| Usual Care | -0.9 (4.7) | 0.0 (4.8) | -0.8 (4.3) | 0.5 (5.6) | -0.6 (4.8) | -0.1 (4.7) | 0.4 (4.6) | -1.9 (5.1) |

a The Area Deprivation Index (ADI) is a neighborhood disadvantage metric derived from Census data and the American Community Survey data utilizing participant home addresses. We stratified state decile scores ranging from 1=least disadvantaged to 10=most disadvantaged by 1-7 (less disadvantaged) vs. 8-10 (most disadvantaged) utilizing established cut-offs.
